# Supplementary material for: Immune-mediated diseases are associated with a higher incidence of dementia: a prospective cohort study of 375,894 individuals
Source: Springer Nature journal article supplement (doi:10.1186/s13195-022-01072-x), 2022-09-13
Supplement: MOESM1 [file 23481874]

# **Longitudinal association of immune-mediated diseases with incident dementia**

## **Supplementary information**

**Supplementary Table 1. The list of immune-mediated diseases and their ICD-10 codes used in the study**

**Supplementary Table 2. The list of dementias and their codes used in the study**

**Supplementary Table 3. Baseline characteristics of UKB participants by immune-mediated diseases status**

**Supplementary Table 4. Risk for incident dementia according to the status of any immune-mediated diseases stratified by gender**

**Supplementary Table 5. Sensitivity analysis of the risk for incident dementia according to the status of any immune-mediated diseases**

**Supplementary Table 6. FDR adjusted risk for incident dementia according to the status of individual immune-mediated diseases**

**Supplementary Table 7. Sensitivity analysis of the risk for incident dementia according to the status of individual immune-mediated diseases**

**Supplementary Table 8. The interaction analyses between sex and peripheral immune cells in contributing to the dementia incidence**

**Supplementary Figure 1. Flowchart of the participants selection**

**Supplementary Figure 2. Peripheral immune cells mediation models of the relationship between individual immune-mediated diseases and dementia**

**Supplementary Table 1. The list of immune-mediated diseases and their ICD-10 codes used in the study**

|    | Immune-mediated disease                    | ICD-10 codes     |
|----|--------------------------------------------|------------------|
| 1  | Asthma                                     | J45-J46          |
| 2  | Rheumatoid arthritis                       | M05-M06, M08     |
| 3  | Ulcerative colitis                         | K51              |
| 4  | Diabetes mellitus (Type I)                 | E10              |
| 5  | Rheumatic fever / rheumatic heart diseases | I00-I02, I05-I09 |
| 6  | Psoriasis                                  | L40              |
| 7  | Celiac disease                             | K90.0            |
| 8  | Crohn's disease                            | K50              |
| 9  | Polymyalgia rheumatica                     | M35.3            |
| 10 | Multiple sclerosis                         | G35              |
| 11 | Allergic rhinitis                          | J30.1-J30.4      |
| 12 | Rheumatism, unspecified                    | M79.0            |
| 13 | Psoriatic and enteropathic arthropathies   | M07              |
| 14 | Graves' disease / Autoimmune thyroiditis   | E05.0, E06.3     |
| 15 | Ankylosing spondylitis                     | M45              |
| 16 | Necrotizing vasculopathies                 | M31              |
| 17 | Sarcoidosis                                | D86              |
| 18 | Lichen planus                              | L43              |
| 19 | Systemic Lupus erythematosus               | L93, M32         |
| 20 | Idiopathic thrombocytopenic purpura        | D69.3            |

Abbreviations: ICD = International Classification of Diseases.

**Supplementary Table 2. The list of dementias and their codes used in the study**

| Dementias | Code Type | Codes                                                                                                                                                                                                                                                                                                                                                                                                                                                                                                                                                                                                                                                                                                                                                         |
|-----------|-----------|---------------------------------------------------------------------------------------------------------------------------------------------------------------------------------------------------------------------------------------------------------------------------------------------------------------------------------------------------------------------------------------------------------------------------------------------------------------------------------------------------------------------------------------------------------------------------------------------------------------------------------------------------------------------------------------------------------------------------------------------------------------|
| ACD       | ICD-9     | 290.2, 290.3, 290.4, 291.2, 294.1, 331.0, 331.1, 331.2, 331.5                                                                                                                                                                                                                                                                                                                                                                                                                                                                                                                                                                                                                                                                                                 |
|           | ICD-10    | A81.0, F00, F00.0, F00.1, F00.2, F00.9, F01, F01.0, F01.1, F01.2, F01.3, F01.8, F01.9, F02, F02.0, F02.1, F02.2, F02.3, F02.4, F02.8, F03, F05.1, F10.6, G30, G30.0, G30.1, G30.8, G30.9, G31.0, G31.1, G31.8, I67.3                                                                                                                                                                                                                                                                                                                                                                                                                                                                                                                                          |
|           | Read V2   | 1461, A411., A4110, E00., E000., E001., E0010, E0011, E0012, E0013, E001z, E002., E0020, E0021, E002z, E003., E004., E0040, E0041, E0042, E0043, E004z, E012., E02y1, E041., Eu00., Eu000, Eu001, Eu002, Eu00z, Eu01., Eu010, Eu011, Eu012, Eu013, Eu01y, Eu01z, Eu02., Eu020, Eu021, Eu022, Eu023, Eu024, Eu025, Eu02y, Eu02z, Eu041, Eu106, Eu107, F110., F1100, F1101, F111., F112., F116., F118., F11x2, F11x7, F11x9, F11y2, F21y2, Fyu30, 38C13, 3AE3., 3AE4., 3AE5., 3AE6., 66h., 6AB., 8BM02, 8BM50, 8BM60, 8BPa., 8CMe0, 8CMG2, 8CMZ., 8CMZ0, 8CMZ1, 8CMZ2, 8CMZ3, 8CSA., 8Hla., 8IAe0, 8IAe2, 9hD., 9hD0., 9hD1., 9Ou., 9Ou1., 9Ou2., 9Ou3., 9Ou4., 9Ou5.                                                                                           |
|           | Read      | .1461, 1461, .E11., .E111, .E112, .E113, .E114, .E115, .E116, .E11Z, .F21Z,                                                                                                                                                                                                                                                                                                                                                                                                                                                                                                                                                                                                                                                                                   |
|           | CTV3      | .F371, .G78., A411., A4110, E00., E000., E001., E0010, E0011, E0012, E0013, E001z, E002., E0020, E0021, E002z, E003., E004., E0040, E0041, E0042, E0043, E004z, E012., E02y1, E041., Eu00., Eu000, Eu001, Eu002, Eu00z, Eu01., Eu010, Eu011, Eu012, Eu013, Eu01y, Eu01z, Eu02., Eu020, Eu021, Eu022, Eu023, Eu024, Eu025, Eu02y, Eu02z, Eu041, F110., F1100, F1101, F111., F112., F116., F118., F11x2, F11x7, F11y2, F21y2, Fyu30, Ub1T6, X002m, X002w, X002x, X002y, X002z, X0030, X0031, X0032, X0033, X0034, X0035, X0036, X0037, X0039, X003A, X003B, X003C, X003D, X003E, X003F, X003G, X003H, X003I, X003J, X003l, X003m, X003P, X003R, X003T, X003V, X003W, X003X, X00R2, X00Rk, Xa0IH, Xa0sC, Xa0sE, Xa1GB, Xa25J, Xa3ez, XaA1S, XabVp, XaE74, XaIKB, |

XaIKC, XaKyY, XaOfZ, XE17j, XE1aG, XE1Xs, XE1Xu,  
 XE1Z6, .3AE3, .3AE4, .3AE5, .3AE6, .66h., .6AB., .9hD1, .9Ou., .9Ou1, .9O  
 u2, .9Ou3, .9Ou4, .9Ou5, 3AE3., 3AE4., 3AE5., 3AE6., 66h., 6AB., 8BM02,  
 8BM50, 8BPa., 8CMe0, 8CMG2, 8CMZ., 8CMZ0, 8CMZ1, 8CMZ2, 8CMZ3,  
 8CSA., 8IAe0, 8IAe2, 9hD1., 9Ou., 9Ou1., 9Ou2., 9Ou3., 9Ou4., 9Ou5.,  
 Xa0fZ, XaaBZ, XaaeA, XaaiW, Xabd2, Xabd3, XabEk, XabEl, XabtQ, XacIx,  
 XacIy, XacIz, XacJ0, XacLx, Xacly, Xaclz, XacM2, Xaefu, XaJBQ, XaJBU,  
 XaJBV, XaJBW, XaJBX, XaJPy, XaLff, XaLFo, XaLFp, XaMFy, XaMG0,  
 XaMGF, XaMGG, XaMGI, XaMGJ, XaMGK, XaMJC, XaYFR, XaYPX,  
 XaZqJ, XaZWz

---

|    |         |                                                                                |
|----|---------|--------------------------------------------------------------------------------|
| AD | ICD-9   | 331.0                                                                          |
|    | ICD-10  | F00, F00.0, F00.1, F00.2, F00.9, G30, G30.0, G30.1, G30.8, G30.9               |
|    | Read V2 | Eu00., Eu000, Eu001, Eu002, Eu00z, F110., F1100, F1101, Fyu30                  |
|    | Read    | .F21Z, Eu00., Eu000, Eu001, Eu002, Eu00z, F110., F1100, F1101, Fyu30,          |
|    | CTV3    | X002x, X002y, X002z, X0030, X0031, X0032, X0033, X003G, XaIKB,<br>XaIKC, XE17j |

---

|    |         |                                                                                                                   |
|----|---------|-------------------------------------------------------------------------------------------------------------------|
| VD | ICD-9   | 290.4                                                                                                             |
|    | ICD-10  | F01, F01.0, F01.1, F01.2, F01.3, F01.8, F01.9, I67.3                                                              |
|    | Read V2 | E004., E0040, E0041, E0042, E0043, E004z, E012., Eu01., Eu010, Eu011,<br>Eu012, Eu013, Eu01y, Eu01z, F11x2, F21y2 |
|    | Read    | .E115, .E116, .G78., E004., E0040, E0041, E0042, E0043, E004z, Eu01.,                                             |
|    | CTV3    | Eu010, Eu011, Eu012, Eu013, Eu01y, Eu01z, F11x2, F21y2, X003R, X003T,<br>X003V, X003W, Xa0IH, XE1Xs               |

---

Abbreviations: ACD = All-Cause Dementia, AD = Alzheimer's Disease, VD = Vascular Dementia, ICD = International Classification of Diseases, Read V2 = Read codes version 2, Read CTV3 = Read codes version 3.

**Supplementary Table 3. Baseline characteristics of UKB participants by immune-mediated diseases status (N=375,894)**

|                                          | None immune-mediated diseases<br>(N=317305) | Any immune-mediated diseases<br>(N=58589) | p-value |
|------------------------------------------|---------------------------------------------|-------------------------------------------|---------|
| Age, y                                   | 57.18 (7.80)                                | 58.10 (7.90)                              | <0.001  |
| Female, n (%)                            | 171171 (53.95%)                             | 34404 (58.72%)                            | <0.001  |
| <i>ApoE</i> $\epsilon$ 4 carriers, n (%) | 78039 (28.68%)                              | 14066 (28.28%)                            | 0.071   |
| Higher education, n (%)                  | 113503 (44.84%)                             | 18040 (41.89%)                            | <0.001  |
| Ethnicity_White, n (%)                   | 299685 (94.96%)                             | 54787 (94.12%)                            | <0.001  |
| BMI, Kg/m <sup>2</sup>                   | 27.52 (4.77)                                | 28.61 (5.53)                              | <0.001  |
| Townsend deprivation score               | -1.30 (3.09)                                | -0.89 (3.27)                              | <0.001  |
| Smoking                                  |                                             |                                           | <0.001  |
| Never, n (%)                             | 168570 (53.44%)                             | 28757 (49.46%)                            |         |
| Previous, n (%)                          | 112233 (35.58%)                             | 22658 (38.97%)                            |         |
| Current, n (%)                           | 34626 (10.98%)                              | 6724 (11.57%)                             |         |
| Alcohol consumption                      |                                             |                                           | <0.001  |
| Never, n (%)                             | 13785 (4.36%)                               | 3605 (6.18%)                              |         |
| Previous, n (%)                          | 11377 (3.60%)                               | 3548 (6.08%)                              |         |
| Current, n (%)                           | 291119 (92.04%)                             | 51184 (87.74%)                            |         |
| Incident ACD                             | 4089 (1.29%)                                | 1202 (2.05%)                              | <0.001  |
| Incident AD                              | 1835 (0.58%)                                | 466 (0.81%)                               | <0.001  |
| Incident VD                              | 909 (0.29%)                                 | 340 (0.59%)                               | <0.001  |
| Overall health rating                    | 2.14 (0.71)                                 | 2.58 (0.81)                               | <0.001  |

Data presented as mean (SD) for continuous variables and number (%) for categorical variables. Higher education refers to College/university/other professional qualification.

Abbreviations: ACD = All-Cause Dementia, AD = Alzheimer's Disease, VD = Vascular Dementia, BMI = Body Mass Index.

**Supplementary Table 4. Risk for incident dementia according to the status of any immune-mediated diseases stratified by gender**

|        | Model 1 (HR, 95%CI)  | Model 2 (HR, 95%CI)  | Model 3 (HR, 95%CI)  |
|--------|----------------------|----------------------|----------------------|
| ACD    |                      |                      |                      |
| All    | 1.27 (1.19-1.35) *** | 1.13 (1.03-1.25) **  | 1.10 (1.00-1.21) *   |
| Female | 1.28 (1.17-1.41) *** | 1.15 (1.00-1.31) *   | 1.10 (0.95-1.26)     |
| Male   | 1.30 (1.18-1.42) *** | 1.13 (0.99-1.28)     | 1.11 (0.97-1.26)     |
| AD     |                      |                      |                      |
| All    | 1.09 (0.98-1.20)     | 0.91 (0.79-1.07)     | 0.91 (0.78-1.06)     |
| Female | 1.10 (0.96-1.26)     | 0.88 (0.71-1.09)     | 0.87 (0.70-1.07)     |
| Male   | 1.09 (0.93-1.27)     | 0.96 (0.77-1.19)     | 0.96 (0.77-1.19)     |
| VD     |                      |                      |                      |
| All    | 1.61 (1.42-1.83) *** | 1.52 (1.26-1.83) *** | 1.43 (1.19-1.73) **  |
| Female | 1.54 (1.27-1.87) *** | 1.32 (0.98-1.78)     | 1.20 (0.88-1.63)     |
| Male   | 1.76 (1.50-2.08) *** | 1.67 (1.32-2.12) *** | 1.61 (1.27-2.04) *** |

Model 1 unadjusted. Model 2 adjusted for age, sex (for all participants), *ApoE-ε4* and education. Model 3 adjusted for age, sex (for all participants), education, *ApoE-ε4*, ethnicity, BMI, Townsend deprivation score, smoking and alcohol consumption. (\*p < 0.05, \*\*p < 0.01, \*\*\*p < 0.001)

Abbreviations: ACD = All-Cause Dementia, AD = Alzheimer's Disease, VD = Vascular Dementia, HR = Hazard Ratio, CI = Confidence Interval.

**Supplementary Table 5. Sensitivity analyses of the risk for incident dementia according to the status of any immune-mediated diseases by excluding the participants with follow up time less than 5 or 10 years**

| Follow up time | Model 1 (HR, 95%CI)  | Model 2 (HR, 95%CI)  | Model 3 (HR, 95%CI)  |
|----------------|----------------------|----------------------|----------------------|
| ACD            |                      |                      |                      |
| ≥5 years       | 1.28 (1.20-1.38) *** | 1.16 (1.05-1.28) **  | 1.13 (1.02-1.25) *   |
| ≥10 years      | 1.23 (1.09-1.40) *** | 1.22 (1.02-1.45) *   | 1.17 (0.98-1.40)     |
| AD             |                      |                      |                      |
| ≥5 years       | 1.10 (0.99-1.22)     | 0.94 (0.80-1.11)     | 0.94 (0.80-1.10)     |
| ≥10 years      | 1.19 (0.99-1.43)     | 1.13 (0.86-1.47)     | 1.10 (0.84-1.45)     |
| VD             |                      |                      |                      |
| ≥5 years       | 1.63 (1.43-1.87) *** | 1.61 (1.32-1.96) *** | 1.51 (1.23-1.84) *** |
| ≥10 years      | 1.65 (1.30-2.09) *** | 1.78 (1.26-2.51) **  | 1.65 (1.16-2.34) **  |

Model 1 unadjusted. Model 2 adjusted for age, sex, *ApoE-ε4* and education. Model 3 adjusted for age, sex, education, *ApoE-ε4*, ethnicity, BMI, Townsend deprivation score, smoking and alcohol consumption. (\*p < 0.05, \*\*p < 0.01, \*\*\*p < 0.001)

Abbreviations: ACD = All-Cause Dementia, AD = Alzheimer's Disease, VD = Vascular Dementia, HR = Hazard Ratio, CI = Confidence Interval.

**Supplementary Table 6. FDR adjusted risk for incident dementia according to the status of individual immune-mediated diseases**

| Individual immune-mediated diseases        | ACD              |        | AD               |        | VD               |        |
|--------------------------------------------|------------------|--------|------------------|--------|------------------|--------|
|                                            | HR (95% CI)      | Q      | HR (95% CI)      | Q      | HR (95% CI)      | Q      |
| Asthma                                     | 1.02 (0.89-1.16) | 0.89   | 0.83 (0.66-1.03) | 0.33   | 1.28 (0.99-1.66) | 0.32   |
| Rheumatoid arthritis                       | 1.00 (0.77-1.30) | 1.04   | 1.03 (0.71-1.50) | 1.03   | 0.65 (0.32-1.32) | 0.52   |
| Ulcerative colitis                         | 0.80 (0.56-1.16) | 0.68   | 0.37 (0.17-0.83) | 0.15   | 0.52 (0.19-1.39) | 0.48   |
| Diabetes mellitus (Type I)                 | 2.49 (1.97-3.15) | 6.E-13 | 2.21 (1.49-3.28) | 1.E-03 | 4.25 (2.90-6.23) | 2.E-12 |
| Rheumatic fever / rheumatic heart diseases | 1.36 (1.05-1.77) | 0.14   | 1.10 (0.71-1.69) | 0.96   | 2.40 (1.58-3.66) | 5.E-04 |
| Psoriasis                                  | 1.14 (0.78-1.67) | 0.82   | 0.88 (0.46-1.69) | 0.93   | 2.26 (1.27-4.01) | 0.04   |
| Celiac disease                             | 0.83 (0.50-1.39) | 0.88   | 0.95 (0.47-1.90) | 0.98   | 0.57 (0.14-2.27) | 0.77   |
| Crohn's disease                            | 0.93 (0.56-1.54) | 0.96   | 0.69 (0.29-1.66) | 0.81   | 0.60 (0.15-2.42) | 0.73   |
| Polymyalgia rheumatica                     | 1.00 (0.67-1.49) | 1.00   | 0.71 (0.35-1.43) | 0.75   | 1.29 (0.61-2.72) | 0.73   |
| Multiple sclerosis                         | 2.87 (1.92-4.30) | 3.E-06 | 1.11 (0.42-2.97) | 1.04   | 2.50 (0.93-6.71) | 0.27   |
| Allergic rhinitis                          | 0.73 (0.36-1.46) | 0.83   | 0.41 (0.10-1.65) | 0.60   | 0.46 (0.06-3.29) | 0.74   |
| Rheumatism, unspecified                    | 1.49 (0.82-2.71) | 0.62   | 1.44 (0.60-3.47) | 0.76   | 1.38 (0.34-5.56) | 0.87   |
| Psoriatic and enteropathic arthropathies   | 1.43 (0.74-2.76) | 0.71   | 1.84 (0.76-4.42) | 0.59   | 2.25 (0.72-7.00) | 0.46   |
| Graves' disease / Autoimmune thyroiditis   | 1.15 (0.52-2.57) | 0.97   | 1.28 (0.41-3.98) | 1.03   | 0.99 (0.14-7.06) | 0.99   |



|                                           |                  |      |                  |      |                  |      |
|-------------------------------------------|------------------|------|------------------|------|------------------|------|
| Ankylosing<br>spondylitis                 | 1.28 (0.57-2.84) | 0.85 | 1.04 (0.26-4.18) | 1.00 | 2.03 (0.50-8.13) | 0.64 |
| Necrotizing<br>vasculopathies             | 1.71 (1.03-2.85) | 0.19 | 2.13 (1.06-4.27) | 0.23 | 2.18 (0.82-5.86) | 0.40 |
| Sarcoidosis                               | 1.62 (0.81-3.24) | 0.70 | 2.29 (0.95-5.52) | 0.32 | 1.03 (0.14-7.30) | 1.09 |
| Lichen planus                             | 0.77 (0.32-1.86) | 0.81 | 0.31 (0.04-2.23) | 0.62 | 0.70 (0.10-5.00) | 0.91 |
| Systemic Lupus<br>erythematosus           | 1.36 (0.61-3.03) | 0.91 | 1.38 (0.44-4.29) | 0.96 | 1.13 (0.16-8.02) | 1.07 |
| Idiopathic<br>thrombocytopenic<br>purpura | 0.87 (0.33-2.32) | 0.92 | 0.99 (0.25-3.95) | 0.98 | 1.02 (0.14-7.28) | 1.03 |

---

Adjusted for age, sex, education, *ApoE-ε4*, ethnicity, BMI, Townsend deprivation score, smoking and alcohol consumption. (p values adjusted to control the false discovery rate at 5% using the Benjamini-Hochberg procedure were labeled as Q values)

Abbreviations: ACD = All-Cause Dementia, AD = Alzheimer's Disease, VD = Vascular Dementia, HR = Hazard Ratio, CI = Confidence Interval.

**Supplementary Table 7. Sensitivity analyses of the risk for incident dementia according to the status of individual immune-mediated diseases by excluding the participants with follow up time less than 5 or 10 years**

| Model 1 HR (95% CI)                           | ACD                  |                      | AD                   |                    | VD                   |                       |
|-----------------------------------------------|----------------------|----------------------|----------------------|--------------------|----------------------|-----------------------|
| Follow up time                                | ≥5 years             | ≥10 years            | ≥5 years             | ≥10 years          | ≥5 years             | ≥10 years             |
| Asthma                                        | 1.18 (1.07-1.29) *** | 1.18 (1.00-1.38) *   | 1.00 (0.87-1.16)     | 1.12 (0.88-1.43)   | 1.55 (1.30-1.84) *** | 1.63 (1.21-2.20) **   |
| Rheumatoid arthritis                          | 1.40 (1.18-1.67) *** | 1.47 (1.10-1.96) **  | 1.45 (1.13-1.87) **  | 1.60 (1.06-2.41) * | 1.31 (0.89-1.93)     | 1.25 (0.64-2.43)      |
| Ulcerative colitis                            | 0.87 (0.66-1.14)     | 0.76 (0.46-1.25)     | 0.61 (0.38-0.98) *   | 0.52 (0.21-1.24)   | 0.59 (0.30-1.19)     | 0.43 (0.11-1.72)      |
| Diabetes mellitus (Type I)                    | 2.83 (2.39-3.35) *** | 1.94 (1.39-2.72) *** | 2.37 (1.81-3.10) *** | 1.33 (0.73-2.43)   | 4.70 (3.56-6.21) *** | 4.52 (2.80-7.32) ***  |
| Rheumatic fever /<br>rheumatic heart diseases | 2.00 (1.63-2.45) *** | 1.48 (1.00-2.20)     | 1.41 (0.99-2.02)     | 1.56 (0.88-2.76)   | 3.39 (2.43-4.74) *** | 2.15 (1.06-4.36) *    |
| Psoriasis                                     | 1.49 (1.16-1.92) **  | 1.72 (1.15-2.58) **  | 1.26 (0.84-1.89)     | 1.56 (0.83-2.91)   | 2.18 (1.40-3.40) *** | 2.60 (1.28-5.26) **   |
| Celiac disease                                | 0.91 (0.62-1.34)     | 0.76 (0.36-1.59)     | 0.89 (0.51-1.57)     | 0.92 (0.34-2.46)   | 0.62 (0.23-1.65)     | 0.48 (0.07-3.44)      |
| Crohn's disease                               | 0.77 (0.52-1.14)     | 0.57 (0.27-1.19)     | 0.57 (0.30-1.11)     | 0.35 (0.09-1.41)   | 0.26 (0.07-1.06)     | NA                    |
| Polymyalgia rheumatica                        | 1.52 (1.11-2.06) **  | 1.72 (1.06-2.78) *   | 1.04 (0.60-1.80)     | 1.10 (0.46-2.66)   | 1.99 (1.12-3.52) *   | 1.37 (0.44-4.28)      |
| Multiple sclerosis                            | 1.50 (1.06-2.12) *   | 0.96 (0.45-2.01)     | 0.80 (0.40-1.61)     | 0.89 (0.29-2.76)   | 1.46 (0.69-3.07)     | NA                    |
| Allergic rhinitis                             | 0.87 (0.55-1.38)     | 1.30 (0.67-2.50)     | 0.52 (0.22-1.25)     | 1.25 (0.47-3.34)   | 1.51 (0.72-3.17)     | 3.27 (1.35-7.94) **   |
| Rheumatism, unspecified                       | 1.36 (0.93-2.00)     | 1.41 (0.76-2.62)     | 1.36 (0.77-2.39)     | 1.23 (0.46-3.28)   | 1.17 (0.49-2.82)     | 0.63 (0.09-4.52)      |
| Psoriatic and enteropathic<br>arthropathies   | 1.23 (0.76-1.98)     | 1.44 (0.69-3.03)     | 1.55 (0.83-2.88)     | 2.21 (0.92-5.34)   | 0.97 (0.31-3.01)     | 0.93 (0.13-6.63)      |
| Graves' disease /<br>Autoimmune thyroiditis   | 1.01 (0.56-1.82)     | 1.46 (0.60-3.51)     | 0.98 (0.41-2.36)     | 0.63 (0.09-4.49)   | 0.41 (0.06-2.91)     | 1.34 (0.19-9.52)      |
| Ankylosing spondylitis                        | 1.33 (0.72-2.48)     | 1.58 (0.59-4.21)     | 1.72 (0.77-3.82)     | 1.71 (0.43-6.84)   | 1.78 (0.57-5.53)     | 1.77 (0.25-12.59)     |
| Necrotizing vasculopathies                    | 1.95 (1.31-2.92) **  | 2.02 (1.05-3.90) *   | 1.74 (0.94-3.25)     | 1.91 (0.71-5.11)   | 2.52 (1.20-5.31) *   | 3.97 (1.48-10.67) **  |
| Sarcoidosis                                   | 1.19 (0.68-2.10)     | 0.59 (0.15-2.38)     | 0.86 (0.32-2.29)     | NA                 | 1.76 (0.66-4.72)     | 2.68 (0.66-10.77)     |
| Lichen planus                                 | 1.40 (0.79-2.47)     | 1.90 (0.79-4.59)     | 1.50 (0.67-3.35)     | 2.48 (0.80-7.73)   | 1.04 (0.26-4.17)     | 1.75 (0.24-12.45)     |
| Systemic Lupus<br>erythematosus               | 1.10 (0.59-2.05)     | 0.32 (0.04-2.27)     | 1.65 (0.78-3.46)     | 0.69 (0.10-4.91)   | 0.49 (0.07-3.47)     | NA                    |
| Idiopathic<br>thrombocytopenic purpura        | 1.19 (0.60-2.39)     | 1.79 (0.67-4.79)     | 0.96 (0.31-2.99)     | 1.95 (0.49-7.81)   | 1.33 (0.33-5.34)     | 2.04 (0.29-14.57)     |
| Model 2 HR (95% CI)                           | ACD                  |                      | AD                   |                    | VD                   |                       |
| Follow up time                                | ≥5 years             | ≥10 years            | ≥5 years             | ≥10 years          | ≥5 years             | ≥10 years             |
| Asthma                                        | 1.06 (0.92-1.22)     | 1.19 (0.94-1.51)     | 0.85 (0.68-1.07)     | 1.19 (0.84-1.69)   | 1.45 (1.10-1.89) **  | 1.52 (0.94-2.45)      |
| Rheumatoid arthritis                          | 1.13 (0.87-1.48)     | 1.39 (0.92-2.09)     | 1.15 (0.79-1.68)     | 0.96 (0.47-1.95)   | 0.89 (0.46-1.73)     | 1.22 (0.45-3.32)      |
| Ulcerative colitis                            | 0.75 (0.50-1.14)     | 0.82 (0.41-1.66)     | 0.35 (0.15-0.84) *   | 0.23 (0.03-1.62)   | 0.47 (0.15-1.48)     | 1.01 (0.25-4.09)      |
| Diabetes mellitus (Type I)                    | 2.45 (1.89-3.16) *** | 2.33 (1.47-3.68) *** | 2.03 (1.33-3.10) **  | 1.42 (0.59-3.45)   | 4.90 (3.26-7.36) *** | 5.90 (3.08-11.30) *** |
| Rheumatic fever /<br>rheumatic heart diseases | 1.50 (1.15-1.97) **  | 1.19 (0.70-2.03)     | 1.19 (0.77-1.86)     | 1.30 (0.61-2.75)   | 2.81 (1.83-4.33) *** | 3.18 (1.55-6.55) **   |
| Psoriasis                                     | 1.23 (0.83-1.83)     | 1.19 (0.59-2.40)     | 1.06 (0.57-1.98)     | 1.63 (0.67-3.96)   | 2.35 (1.25-4.40) **  | 2.17 (0.69-6.85)      |
| Celiac disease                                | 0.94 (0.55-1.58)     | 0.62 (0.20-1.92)     | 0.98 (0.47-2.07)     | 0.88 (0.22-3.53)   | 0.64 (0.16-2.58)     | 1.05 (0.15-7.56)      |
| Crohn's disease                               | 1.02 (0.60-1.73)     | 0.65 (0.21-2.01)     | 0.78 (0.32-1.87)     | 0.47 (0.07-3.38)   | 0.72 (0.18-2.88)     | NA                    |
| Polymyalgia rheumatica                        | 1.07 (0.71-1.61)     | 0.82 (0.37-1.83)     | 0.79 (0.40-1.59)     | 0.88 (0.28-2.76)   | 1.07 (0.44-2.60)     | NA                    |
| Multiple sclerosis                            | 2.50 (1.59-3.92) *** | 2.43 (1.09-5.45) *   | 1.13 (0.42-3.02)     | 2.72 (0.87-8.51)   | 2.09 (0.67-6.52)     | NA                    |
| Allergic rhinitis                             | 0.85 (0.42-1.70)     | 1.33 (0.50-3.55)     | 0.46 (0.11-1.83)     | 1.47 (0.37-5.92)   | 0.54 (0.08-3.84)     | 1.73 (0.24-12.40)     |

| Rheumatism, unspecified                    | 1.90 (1.08-3.36) *   | 2.65 (1.18-5.94) *   | 1.85 (0.83-4.13)     | 3.43 (1.27-9.25) *  | 2.56 (0.82-8.01)     | 2.73 (0.38-19.70)    |
|--------------------------------------------|----------------------|----------------------|----------------------|---------------------|----------------------|----------------------|
| Psoriatic and enteropathic arthropathies   | 1.40 (0.70-2.81)     | 1.07 (0.27-4.28)     | 2.24 (1.00-5.01) *   | 3.60 (1.15-11.26) * | 1.78 (0.44-7.15)     | NA                   |
| Graves' disease / Autoimmune thyroiditis   | 1.32 (0.59-2.94)     | 2.42 (0.90-6.48)     | 1.37 (0.44-4.27)     | 1.28 (0.18-9.16)    | 1.14 (0.16-8.10)     | 3.41 (0.47-24.51)    |
| Ankylosing spondylitis                     | 1.12 (0.47-2.70)     | 1.38 (0.34-5.52)     | 0.99 (0.25-3.97)     | 1.59 (0.22-11.32)   | 1.15 (0.16-8.17)     | NA                   |
| Necrotizing vasculopathies                 | 1.77 (1.03-3.06) *   | 1.83 (0.76-4.42)     | 1.80 (0.81-4.03)     | 1.60 (0.4-6.46)     | 2.62 (0.98-7.02)     | 3.72 (0.92-15.13)    |
| Sarcoidosis                                | 1.39 (0.62-3.09)     | NA                   | 1.51 (0.49-4.69)     | NA                  | 1.15 (0.16-8.18)     | NA                   |
| Lichen planus                              | 0.75 (0.28-1.99)     | 0.61 (0.09-4.33)     | 0.37 (0.05-2.61)     | NA                  | 0.87 (0.12-6.22)     | 3.04 (0.42-21.84)    |
| Systemic Lupus erythematosus               | 1.37 (0.57-3.29)     | 0.73 (0.10-5.20)     | 1.61 (0.52-5.02)     | NA                  | 1.37 (0.19-9.77)     | NA                   |
| Idiopathic thrombocytopenic purpura        | 1.06 (0.40-2.82)     | 1.38 (0.34-5.53)     | 1.16 (0.29-4.64)     | 1.52 (0.21-10.86)   | 1.25 (0.18-8.89)     | NA                   |
| Model 3 HR (95% CI)                        | ACD                  |                      | AD                   |                     | VD                   |                      |
| Follow up time                             | ≥5 years             | ≥10 years            | ≥5 years             | ≥10 years           | ≥5 years             | ≥10 years            |
| Asthma                                     | 1.04 (0.90-1.20)     | 1.17 (0.92-1.48)     | 0.84 (0.67-1.05)     | 1.18 (0.83-1.68)    | 1.36 (1.03-1.79) *   | 1.46 (0.91-2.37)     |
| Rheumatoid arthritis                       | 1.09 (0.84-1.43)     | 1.31 (0.86-1.99)     | 1.17 (0.80-1.70)     | 0.95 (0.47-1.93)    | 0.75 (0.37-1.51)     | 0.88 (0.28-2.78)     |
| Ulcerative colitis                         | 0.71 (0.47-1.08)     | 0.71 (0.34-1.50)     | 0.35 (0.14-0.84) *   | 0.23 (0.03-1.62)    | 0.46 (0.15-1.42)     | 0.99 (0.24-4.02)     |
| Diabetes mellitus (Type I)                 | 2.42 (1.86-3.13) *** | 2.23 (1.40-3.54) *** | 2.12 (1.39-3.25) *** | 1.44 (0.59-3.52)    | 4.34 (2.87-6.56) *** | 5.07 (2.60-9.86) *** |
| Rheumatic fever / rheumatic heart diseases | 1.44 (1.09-1.89) *   | 1.16 (0.68-1.98)     | 1.19 (0.76-1.86)     | 1.27 (0.60-2.7)     | 2.59 (1.67-4.03) *** | 3.02 (1.47-6.23) **  |
| Psoriasis                                  | 1.18 (0.79-1.77)     | 1.04 (0.49-2.19)     | 0.99 (0.51-1.90)     | 1.33 (0.49-3.57)    | 2.22 (1.18-4.16) *   | 2.05 (0.65-6.47)     |
| Celiac disease                             | 0.92 (0.54-1.56)     | 0.63 (0.20-1.95)     | 0.95 (0.45-2.00)     | 0.89 (0.22-3.56)    | 0.65 (0.16-2.63)     | 1.09 (0.15-7.86)     |
| Crohn's disease                            | 1.01 (0.60-1.70)     | 0.65 (0.21-2.02)     | 0.78 (0.32-1.88)     | 0.48 (0.07-3.44)    | 0.70 (0.17-2.81)     | NA                   |
| Polymyalgia rheumatica                     | 1.07 (0.71-1.62)     | 0.82 (0.36-1.83)     | 0.81 (0.40-1.62)     | 0.90 (0.29-2.81)    | 1.05 (0.43-2.54)     | NA                   |
| Multiple sclerosis                         | 2.55 (1.60-4.07) *** | 2.71 (1.21-6.08) *   | 1.26 (0.47-3.38)     | 3.09 (0.99-9.7)     | 2.19 (0.70-6.84)     | NA                   |
| Allergic rhinitis                          | 0.87 (0.43-1.74)     | 1.37 (0.51-3.66)     | 0.47 (0.12-1.88)     | 1.54 (0.38-6.2)     | 0.55 (0.08-3.88)     | 1.75 (0.24-12.53)    |
| Rheumatism, unspecified                    | 1.56 (0.84-2.91)     | 2.09 (0.86-5.08)     | 1.62 (0.67-3.91)     | 3.38 (1.25-9.18) *  | 1.54 (0.38-6.20)     | NA                   |
| Psoriatic and enteropathic arthropathies   | 1.30 (0.62-2.73)     | 0.55 (0.08-3.94)     | 2.06 (0.86-4.98)     | 2.56 (0.64-10.32)   | 1.73 (0.43-6.95)     | NA                   |
| Graves' disease / Autoimmune thyroiditis   | 1.34 (0.60-2.98)     | 2.50 (0.93-6.69)     | 1.45 (0.47-4.52)     | 1.36 (0.19-9.68)    | 1.11 (0.16-7.90)     | 3.41 (0.47-24.60)    |
| Ankylosing spondylitis                     | 0.99 (0.37-2.63)     | 0.74 (0.10-5.28)     | 0.58 (0.08-4.14)     | NA                  | 1.19 (0.17-8.49)     | NA                   |
| Necrotizing vasculopathies                 | 1.73 (1.00-2.99) *   | 1.82 (0.75-4.38)     | 1.80 (0.80-4.02)     | 1.60 (0.40-6.43)    | 2.48 (0.93-6.67)     | 3.72 (0.91-15.11)    |
| Sarcoidosis                                | 1.44 (0.65-3.21)     | NA                   | 1.57 (0.50-4.87)     | NA                  | 1.18 (0.17-8.42)     | NA                   |
| Lichen planus                              | 0.73 (0.27-1.95)     | 0.60 (0.08-4.25)     | 0.36 (0.05-2.58)     | NA                  | 0.83 (0.12-5.91)     | 2.89 (0.40-20.80)    |
| Systemic Lupus erythematosus               | 1.31 (0.55-3.17)     | 0.72 (0.10-5.16)     | 1.59 (0.51-4.94)     | NA                  | 1.29 (0.18-9.20)     | NA                   |
| Idiopathic thrombocytopenic purpura        | 1.00 (0.38-2.68)     | 1.35 (0.34-5.4)      | 1.10 (0.27-4.41)     | 1.47 (0.21-10.48)   | 1.17 (0.16-8.34)     | NA                   |

Model 1 unadjusted. Model 2 adjusted for age, sex, *ApoE-ε4* and education. Model 3 adjusted for age, sex, education, *ApoE-ε4*, ethnicity, BMI, Townsend deprivation score, smoking and alcohol consumption. (\* p < 0.05, \*\* p < 0.01, \*\*\* p < 0.001)

Abbreviations: ACD = All-Cause Dementia, AD = Alzheimer's Disease, VD = Vascular Dementia, HR = Hazard Ratio, CI = Confidence Interval.

**Supplementary Table 8. The interaction analyses between sex and peripheral immune cells in contributing to the dementia incidence**

|             | <b>Female</b>    |        | <b>Male</b>      |        |
|-------------|------------------|--------|------------------|--------|
| <b>ACD</b>  | HR (95%CI)       | p      | HR (95%CI)       | p      |
| Neutrophils | 1.10 (1.06-1.14) | 8.E-07 | 1.07 (1.04-1.11) | 8.E-05 |
| Lymphocytes | 0.94 (0.86-1.02) | 0.134  | 0.94 (0.88-1.01) | 0.074  |
| <b>AD</b>   | HR (95%CI)       | p      | HR (95%CI)       | p      |
| Neutrophils | 1.06 (1.01-1.13) | 0.031  | 1.03 (0.97-1.09) | 0.398  |
| Lymphocytes | 0.91 (0.8-1.04)  | 0.153  | 0.97 (0.88-1.06) | 0.153  |
| <b>VD</b>   | HR (95%CI)       | p      | HR (95%CI)       | p      |
| Neutrophils | 1.13 (1.04-1.23) | 0.003  | 1.09 (1.02-1.17) | 0.011  |
| Lymphocytes | 1.00 (0.88-1.14) | 0.944  | 0.94 (0.82-1.08) | 0.399  |

Abbreviations: ACD = All-Cause Dementia, AD = Alzheimer's Disease, VD = Vascular Dementia, HR = Hazard Ratio, CI = Confidence Interval.

**Supplementary Figure 1. Flowchart of the participants selection**

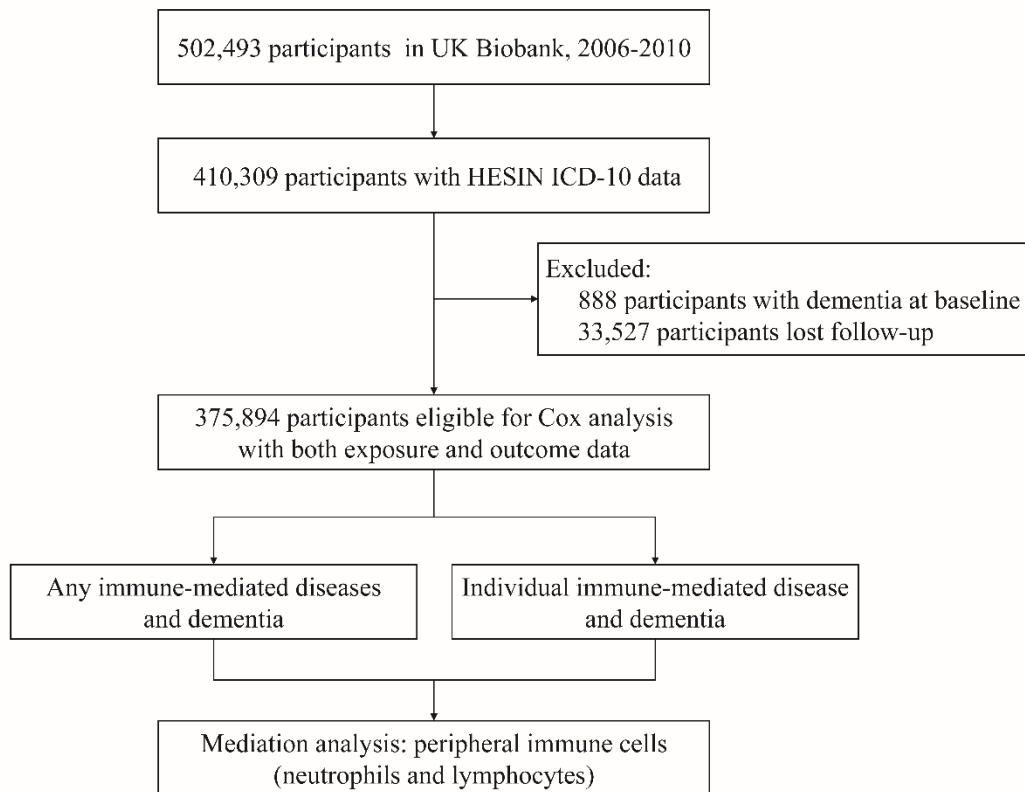

HESIN: Hospital inpatient data.

**Supplementary Figure 2. Peripheral immune cells mediation models of the relationship between individual immune-mediated diseases and dementia**

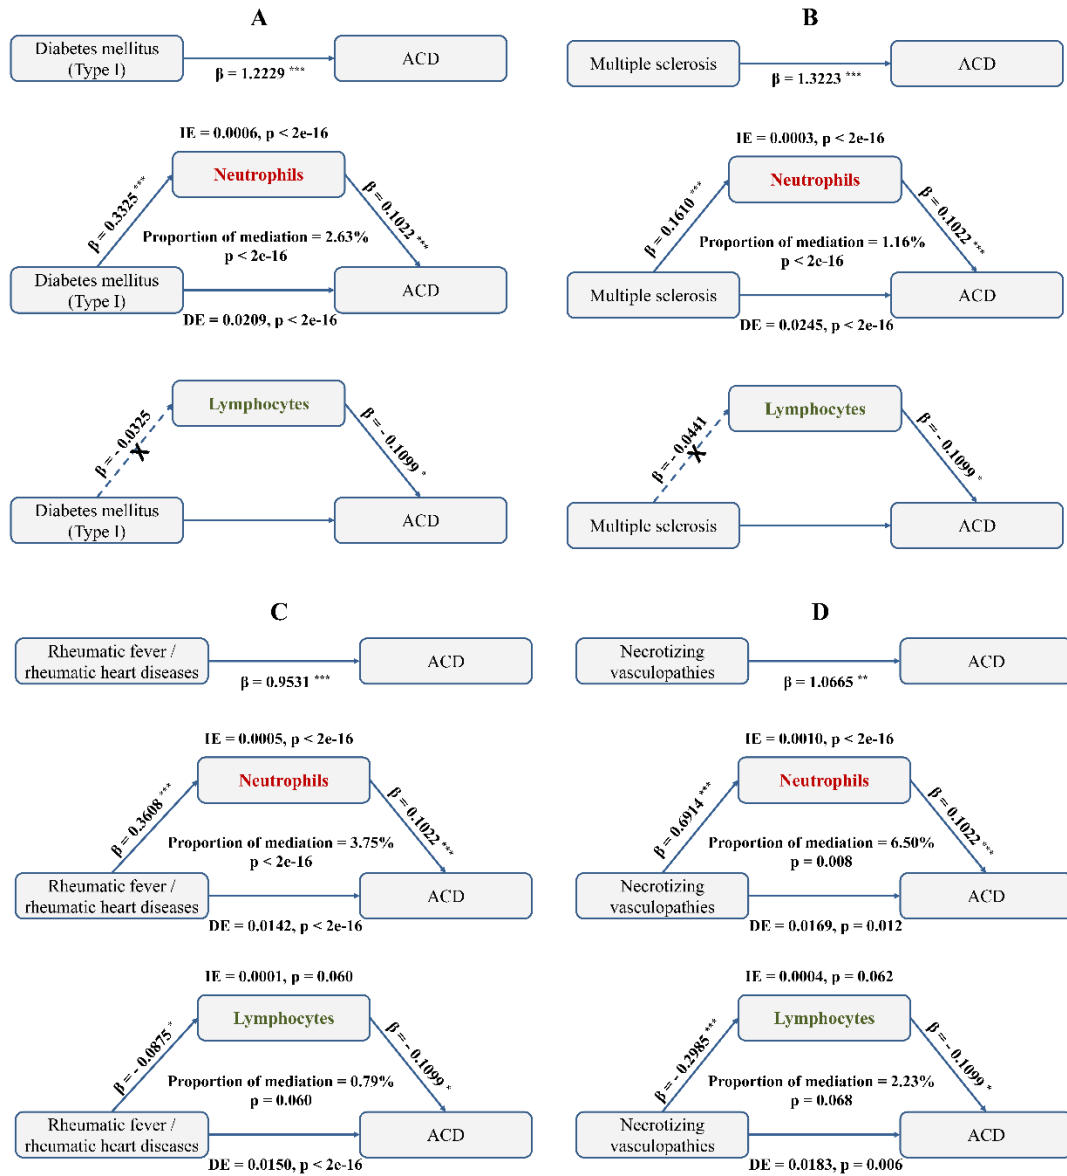

(A) Diabetes mellitus (Type I); (B) Multiple sclerosis; (C) Rheumatic fever / rheumatic heart diseases; (D) Necrotizing vasculopathies. Controlling for age, sex, education, *ApoE-ε4*, ethnicity, BMI, Townsend deprivation score, smoking and alcohol consumption. (\*  $p < 0.05$ , \*\*  $p < 0.01$ , \*\*\*  $p < 0.001$ )

Abbreviations: ACD = All-Cause Dementia, IE = Indirect Effect, DE = Direct Effect.
